# Supplementary material
Source: publisher figshare collection journal article supplement (https://diabetesjournals.figshare.com/ndownloader/files/31383382)
Supplement: Supplementary file 1 [file 31383382]

## **Supplementary materials**

### **MMA measurement**

MMA was measured in venous plasma and/or serum by gas chromatography-mass spectrophotometry (GC/MS) in NHANES 1999-2004 and measured by liquid chromatography-mass spectrophotometry (LC-MS/MS) in NHANES 2011-2014 after butanol derivatization. According to the in-house comparison for the measurement of MMA (n = 326), The LC-MS/MS assay showed excellent correlation (r = 0.99) and agreement (Deming regression, Bland-Altman analysis) compared to the prior GC/MS method. MMA concentrations in pairs of serum and plasma were comparable. The protocols have been described before (*Anal Bioanal Chem.* 2015;407(11):2955-64).

According to the GC/MS method, High-performance GC/MS (Model 6890 GC system and Model 5973 mass selective detector) was procured from Hewlett-Packard, San Fernando, CA. DB-5MS capillary GC column, 0.25mm x 30m, 0.25- $\mu$ m (J&W Scientific, Folsom, CA) was used for chromatographic separation. In brief, 275  $\mu$ L specimens with internal standard solution supplemented by isotope-labeled methyl-d<sup>3</sup>-malonic acid (d<sup>3</sup>MMA) were extracted and subsequently derivatized with cyclohexanol to produce a dicyclohexyl ester. After derivatization and separation (chromatographic run time, 15 min.), the effluent part from the GC column was monitored with a mass selective detector by the selected ion monitoring process. MMA levels were quantitated using the peak area ratios of MMA and the internal standard, isotope-labeled d<sup>3</sup>MMA. There was a favorable linear pattern for MMA in the range of 50-2000 nmol/L. Samples with MMA concentrations > 400 nmol/L were

repeatedly analyzed. The total CV was 4-10% and the mean recovery rate was  $96.0 \pm 1.9\%$ , as described in MMA GC-MS protocols ([https://wwwn.cdc.gov/nchs/data/nhanes/1999-2000/labmethods/lab06\\_met\\_methylmalonic\\_acid.pdf](https://wwwn.cdc.gov/nchs/data/nhanes/1999-2000/labmethods/lab06_met_methylmalonic_acid.pdf)).

Because GC/MS method required 275  $\mu\text{L}$  of sample and had a low throughput (36 samples/run), Ekaterina and colleagues developed and validated an LC-MS/MS method for MMA detection in NHANES 2011-2014. Compared to GC/MS procedures, LC-MS/MS method required less sample volume (75  $\mu\text{L}$ ), and had shorter run time (6 min), higher sensitivity (the limit of detection 22.1 nmol/L), and higher throughput (160 samples/run). Thermo-Electron HPLC System and Thermo-Electron TSQ triple quadrupole mass spectrometer were purchased from Thermo Scientific, West Palm Beach, FL. The Hypersil Gold C18 column (2.1 mm  $\times$  50 mm, 1.9  $\mu\text{m}$  particle size, Thermo Fisher Scientific) was selected because it allowed an excellent separation between MMA and succinic acid (SA) with relatively short chromatography run time, narrow analyte peaks, and excellent service life. MMA is extracted from 75  $\mu\text{L}$  of sample along with an added internal standard (d3-MMA) via liquid-liquid extraction method with tert-butylmethylether. Then, the extracted organic acid is derivatized with butanol to form a dibutylester. The butanol is evaporated under vacuum and the derivatized sample is reconstituted in acetonitrile/water (v/v 50/50). MMA was chromatographically separated from SA using isocratic mobile phase (0.1% acetic acid: methanol 40:60 (v/v), 0.4 mL/min, 35  $^{\circ}\text{C}$ ) within 6 min (retention time 3.47min for SA and 4.25 min for MMA). Multiple reaction monitoring (MRM) was performed

in positive electrospray ionization mode, with two transitions each for MMA ( $m/z$  231  $\rightarrow$  119 and 175.1) and for d3-MMA ( $m/z$  234.1  $\rightarrow$  122.1 and 178.1). According to the in-house comparisons of aqueous calibration and calibration in serum, slopes for the two calibration curves (serum vs. water) were equivalent (less than  $\pm 5\%$  difference), suggesting a minor matrix effect. The sum of the two signals was used for quantitation. The method is linear in the range of 25 to 2500 nmol/L. The total coefficient of variation was 4.9–7.9%, and the recovery rate was  $94.0 \pm 5.5\%$ . The detailed protocols were publicly available ([https://wwwn.cdc.gov/nchs/data/nhanes/2011-2012/labmethods/MMA\\_G\\_MET.pdf](https://wwwn.cdc.gov/nchs/data/nhanes/2011-2012/labmethods/MMA_G_MET.pdf)).

## Supplementary Figure and Tables

**Supplementary Figure 1. The association of all-cause mortality with serum B12, B12 intake from foods, circulating MMA visualized by restricted cubic spline curves**

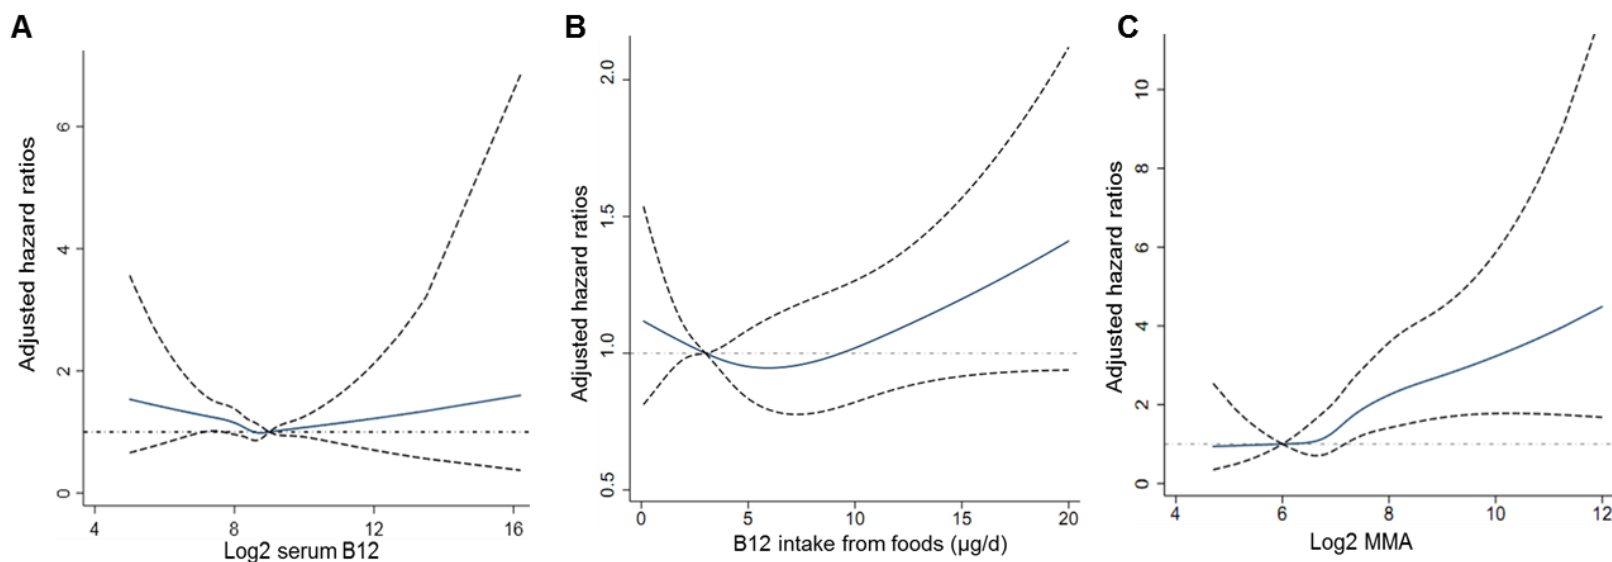

Restricted cubic spline curve showed the adjusted hazard ratios of **(A)** log2 transformed serum B12, **(B)** B12 intake from foods, **(C)** log2 MMA for all-cause mortality based on Cox regression model. Knots included the 5th, 27.5th, 50th, 72.5th, and 95th percentiles of the exposure factor. The model was fully adjusted for age, sex and race/ethnicity, smoking, BMI, hypertension, cancer, CVD, TC/HDL-C ratio, serum B12 (only for MMA model), B12 supplements (only for B12 intake from foods model), eGFR, HbA1c, metformin, duration of diabetes, UACR, and diabetic complications. The solid line represented point estimates, and dashed lines represented 95% CIs.

**Supplementary Figure 2. Associations of all-cause mortality with serum and dietary cobalamin, MMA, and sensitivity to cobalamin in metformin users or nonusers**

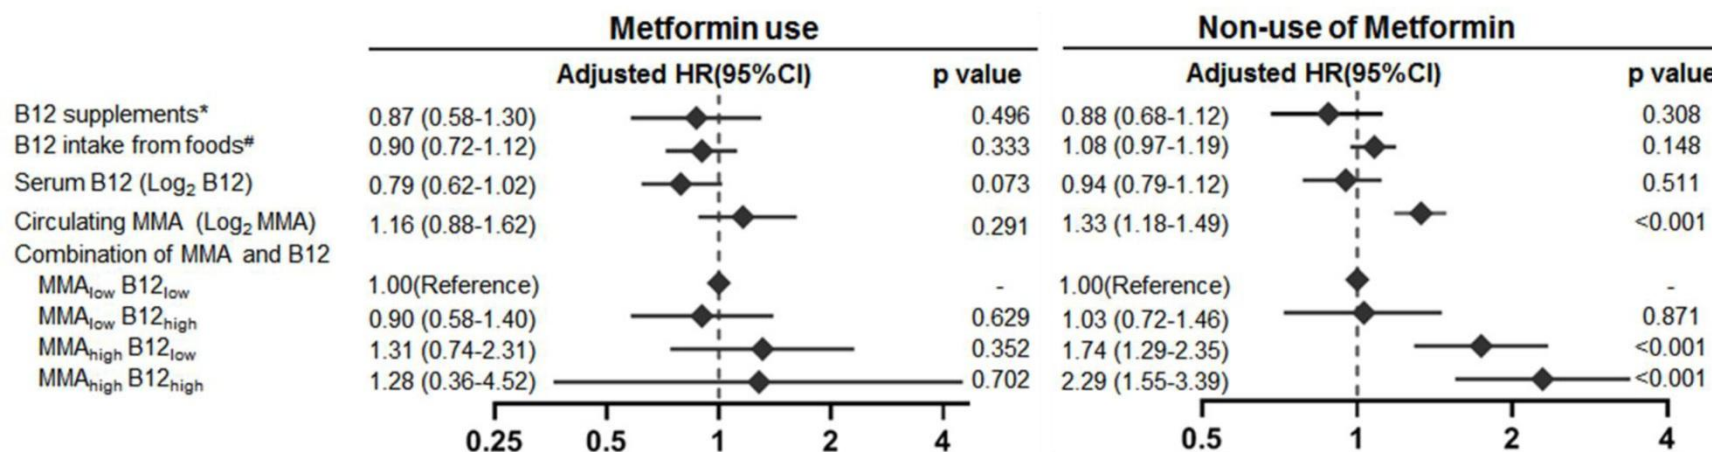

The associations of all-cause mortality with cobalamin, MMA and decreased cobalamin sensitivity stratified by metformin use. \*vitamin B12 supplement use versus nonuse, # cobalamin intake from foods increase per 5 µg/d. HR (95% CI) was estimated by weighted Cox regression analyses after adjustment for age, sex and race/ethnicity, smoking, BMI, hypertension, cancer, CVD, TC/HDL-C ratio, serum cobalamin (only for MMA model), eGFR, HbA1c, duration of diabetes, UACR, and diabetic complications. The model for cobalamin supplements was further adjusted for cobalamin intake from foods and vice versa.

**Supplementary Table 1. Baseline characteristics across the tertiles of serum B12 among diabetic patients**

|                                       | Serum vitamin B12 (pmol/L) |              |              |         |
|---------------------------------------|----------------------------|--------------|--------------|---------|
|                                       | Tertile 1                  | Tertile 2    | Tertile 3    | p trend |
| Serum B12 (pg/ml)                     | 597.4 ± 19.3               | 582.2 ± 17.0 | 617 ± 18.6   | -       |
| Age (year)                            | 59.6 ± 0.5                 | 58.1 ± 0.6   | 60.3 ± 0.4   | 0.325   |
| Male (%)                              | 53.38                      | 54.21        | 46.89        | 0.028   |
| Race/ethnicity (%)                    |                            |              |              |         |
| Non-Hispanic White                    | 67.17                      | 58.57        | 56.33        | <0.001  |
| Non-Hispanic Black                    | 10.63                      | 16.24        | 19.00        | <0.001  |
| Hispanic-Mexican                      | 7.60                       | 9.82         | 9.01         | 0.258   |
| Other Ethnicity                       | 14.61                      | 15.37        | 15.66        | 0.603   |
| Smoking status (%)                    |                            |              |              |         |
| Never                                 | 49.3                       | 48.62        | 44.51        | 0.097   |
| Former                                | 33.76                      | 32.81        | 37.95        |         |
| Current                               | 16.94                      | 18.57        | 17.54        |         |
| BMI (kg/m <sup>2</sup> )              | 33.7 ± 0.4                 | 32.5 ± 0.3   | 31.9 ± 0.4   | <0.001  |
| TC/HDL-C ratio                        | 2.6 ± 0.1                  | 2.3 ± 0.1    | 2.2 ± 0.2    | 0.071   |
| Hypertension (%)                      | 71.16                      | 66.99        | 69           | 0.384   |
| Cancer (%)                            | 27.06                      | 23.67        | 24.07        | 0.151   |
| CVD (%)                               | 14.59                      | 14.2         | 15.62        | 0.638   |
| eGFR (mL/min per 1.73m <sup>2</sup> ) | 85.3 ± 0.9                 | 87.5 ± 1     | 81.5 ± 1.1   | 0.014   |
| UACR (mg/g)                           | 101.2 ± 12.9               | 149 ± 24.9   | 154.8 ± 23.9 | 0.031   |
| HbA1c (%)                             | 7.3 ± 0.1                  | 7.5 ± 0.1    | 7.6 ± 0.1    | 0.002   |
| HbA1c (mmol/mol)                      | 55.8 ± 0.8                 | 58.2 ± 0.8   | 59.3 ± 0.8   | 0.002   |
| Duration of diabetes (year)           | 8.7 ± 0.5                  | 8.4 ± 0.4    | 9.5 ± 0.4    | 0.161   |
| Diabetic complications (%)            | 25.23                      | 29.78        | 27.28        | 0.291   |
| Retinopathy (%)                       | 13.15                      | 16.38        | 16.33        | 0.064   |
| Foot ulcer/sore (%)                   | 3.87                       | 3.06         | 3.61         | 0.755   |
| Peripheral neuropathy (%)             | 14.53                      | 16.92        | 13.89        | 0.777   |
| Metformin (%)                         | 46.41                      | 38.14        | 32.84        | <0.001  |
| B12 supplements (%)                   | 25.21                      | 32.3         | 52.39        | <0.001  |
| B12 intake from foods (µg/d)          | 4.5 ± 0.3                  | 4.9 ± 0.2    | 4.9 ± 0.2    | 0.324   |
| Circulating MMA (nmol/L)              | 256.3 ± 18.9               | 169.9 ± 4.8  | 170.2 ± 6.3  | <0.001  |

Data are represented as weighted percentage or mean (SE). P trend was estimated by weighted linear or logistic regression. BMI, body mass index; CVD, cardiovascular disease; eGFR, estimated glomerular filtration rate; HDL-C, High-density lipoprotein cholesterol; TC, total cholesterol; UACR, urinary albumin-creatinine ratio.

**Supplementary Table 2. Baseline characteristics across the tertiles of B12 intake from foods in patients with T2DM**

|                                       | Vitamin B12 intake from foods (µg/d) |              |              |         |
|---------------------------------------|--------------------------------------|--------------|--------------|---------|
|                                       | Tertile 1                            | Tertile 2    | Tertile 3    | p trend |
| B12 intake from foods (µg/d)          | 1.4 ± 0.1                            | 3.4 ± 0.1    | 8.6 ± 0.3    | -       |
| Age (year)                            | 59.5 ± 0.5                           | 59.5 ± 0.5   | 58.7 ± 0.7   | 0.297   |
| Male (%)                              | 37.66                                | 51.22        | 63.93        | <0.001  |
| Race/ethnicity (%)                    |                                      |              |              |         |
| Non-Hispanic White                    | 53.51                                | 61.4         | 68.95        | <0.001  |
| Non-Hispanic Black                    | 18.91                                | 14.67        | 11.67        | <0.001  |
| Hispanic-Mexican                      | 8.842                                | 9.197        | 7.698        | 0.279   |
| Other Ethnicity                       | 18.74                                | 14.73        | 11.69        | 0.001   |
| Smoking status (%)                    |                                      |              |              |         |
| Never                                 | 51.15                                | 46.01        | 45.33        | 0.097   |
| Former                                | 29.59                                | 35.27        | 38.72        |         |
| Current                               | 19.26                                | 18.72        | 15.95        |         |
| BMI (kg/m <sup>2</sup> )              | 32.1 ± 0.3                           | 32.9 ± 0.3   | 33.3 ± 0.5   | 0.051   |
| TC/HDL-C ratio                        | 2.2 ± 0.1                            | 2.2 ± 0.1    | 2.7 ± 0.1    | 0.018   |
| Hypertension (%)                      | 70.64                                | 67.85        | 69.29        | 0.693   |
| Cancer (%)                            | 28.99                                | 23.59        | 24.08        | 0.056   |
| CVD (%)                               | 14.96                                | 13.64        | 16.27        | 0.582   |
| eGFR (mL/min per 1.73m <sup>2</sup> ) | 83.2 ± 1.1                           | 85.5 ± 1     | 85.9 ± 1     | 0.079   |
| UACR (mg/g)                           | 123.4 ± 19.4                         | 138.1 ± 19.5 | 121.2 ± 18   | 0.901   |
| HbA1c (%)                             | 7.3 ± 0.1                            | 7.5 ± 0.1    | 7.4 ± 0.1    | 0.364   |
| HbA1c (mmol/mol)                      | 56.2 ± 0.7                           | 58.9 ± 1     | 57.4 ± 0.8   | 0.364   |
| Duration of diabetes (year)           | 9.1 ± 0.5                            | 8.4 ± 0.5    | 8.9 ± 0.4    | 0.846   |
| Diabetic complications (%)            | 28.43                                | 26.05        | 27.21        | 0.696   |
| Retinopathy (%)                       | 16.92                                | 14.81        | 12.66        | 0.019   |
| Foot ulcer/sore (%)                   | 2.97                                 | 3.214        | 4.454        | 0.124   |
| Peripheral neuropathy (%)             | 15.93                                | 13.67        | 17           | 0.575   |
| Metformin (%)                         | 36.05                                | 37.3         | 43.84        | 0.023   |
| B12 supplements(%)                    | 36.01                                | 32.24        | 39.85        | 0.162   |
| Serum B12 (pg/ml)                     | 597.4 ± 19.3                         | 582.2 ± 17   | 617.0 ± 18.6 | 0.407   |
| Circulating MMA (nmol/L)              | 211.1 ± 13.6                         | 210.8 ± 18.9 | 184.3 ± 6.2  | 0.078   |

Data are represented as weighted percentage or mean (SE). P trend was estimated by weighted linear or logistic regression. BMI, body mass index; CVD, cardiovascular disease; eGFR, estimated glomerular filtration rate; HDL-C, High-density lipoprotein cholesterol; TC, total cholesterol; UACR, urinary albumin-creatinine ratio.

**Supplementary Table 3. Baseline characteristics in patients with T2DM with or without B12 supplement use**

|                                       | <b>Vitamin B12 supplements</b> |              |                |
|---------------------------------------|--------------------------------|--------------|----------------|
|                                       | <b>Non-use</b>                 | <b>Use</b>   | <b>p value</b> |
| Age (year)                            | 58 ±0.4                        | 61.6 ±0.5    | <0.001         |
| Male (%)                              | 51.93                          | 51.22        | 0.719          |
| Race/ethnicity (%)                    |                                |              |                |
| Non-Hispanic White                    | 55.81                          | 70.34        |                |
| Non-Hispanic Black                    | 16.90                          | 11.70        |                |
| Hispanic-Mexican                      | 10.78                          | 5.15         | <0.001         |
| Other Ethnicity                       | 16.51                          | 12.80        |                |
| Smoking status (%)                    |                                |              |                |
| Never                                 | 48.16                          | 46.63        | 0.001          |
| Former                                | 31.94                          | 39.70        |                |
| Current                               | 19.9                           | 13.67        |                |
| BMI (kg/m <sup>2</sup> )              | 33.2 ±0.3                      | 31.9 ±0.3    | <0.001         |
| TC/HDL-C ratio                        | 2.4 ±0.1                       | 2.4 ±0.1     | 0.895          |
| Hypertension (%)                      | 67.3                           | 72.38        | 0.031          |
| Cancer (%)                            | 24.48                          | 26.00        | 0.512          |
| CVD (%)                               | 13.28                          | 17.44        | 0.012          |
| eGFR (mL/min per 1.73m <sup>2</sup> ) | 86.4 ±0.8                      | 82.1 ±0.9    | 0.001          |
| UACR (mg/g)                           | 148.2 ± 15                     | 106.2 ± 18.1 | 0.081          |
| HbA1c (%)                             | 7.6 ± 0.1                      | 7.1 ± 0.1    | <0.001         |
| HbA1c (mmol/mol)                      | 59.4 ± 0.6                     | 54.5 ± 0.8   | <0.001         |
| Duration of diabetes (year)           | 8.9 ± 0.3                      | 8.7 ± 0.4    | 0.636          |
| Diabetic complications (%)            | 27.11                          | 27.81        | 0.699          |
| Retinopathy (%)                       | 15.38                          | 14.84        | 0.696          |
| Foot ulcer/sore (%)                   | 3.59                           | 3.41         | 0.839          |
| Peripheral neuropathy (%)             | 14.84                          | 15.63        | 0.635          |
| Metformin (%)                         | 39.04                          | 40.43        | 0.590          |
| B12 intake from foods (µg/d)          | 4.7 ± 0.2                      | 4.8 ± 0.2    | 0.842          |
| Serum B12 (pg/ml)                     | 535.4 ± 11.2                   | 714.2 ± 19.9 | <0.001         |
| Circulating MMA (nmol/L)              | 196.4 ± 4.6                    | 210.6 ± 17.9 | 0.439          |

Data are represented as weighted percentage or mean (SE). P trend was estimated by weighted t-student or chi-square test. BMI, body mass index; CVD, cardiovascular disease; eGFR, estimated glomerular filtration rate; HDL-C, High-density lipoprotein cholesterol; TC, total cholesterol; UACR, urinary albumin-creatinine ratio.



**Supplementary Table 4. Baseline characteristics across the tertiles of circulating MMA among diabetic patients**

|                                       | Circulating MMA (nmol/L) |              |              |         |
|---------------------------------------|--------------------------|--------------|--------------|---------|
|                                       | Tertile 1                | Tertile 2    | Tertile 3    | p trend |
| Circulating MMA (nmol/L)              | 96.1 ± 0.9               | 148.7 ± 0.8  | 361.5 ± 20.7 | -       |
| Age (year)                            | 53 ± 0.5                 | 59.2 ± 0.5   | 65.6 ± 0.5   | <0.001  |
| Male (%)                              | 51.51                    | 51.14        | 52.41        | 0.765   |
| Race/ethnicity (%)                    |                          |              |              |         |
| Non-Hispanic White                    | 48.95                    | 62.78        | 71.1         | <0.001  |
| Non-Hispanic Black                    | 19.95                    | 14.98        | 10.23        | <0.001  |
| Hispanic-Mexican                      | 13.77                    | 7.66         | 4.97         | <0.001  |
| Other Ethnicity                       | 17.33                    | 14.58        | 13.7         | 0.024   |
| Smoking status (%)                    |                          |              |              |         |
| Never                                 | 52.06                    | 46.64        | 44.25        | 0.017   |
| Former                                | 27.29                    | 34.54        | 42.26        |         |
| Current                               | 20.65                    | 18.82        | 13.5         |         |
| BMI (kg/m <sup>2</sup> )              | 32.8 ± 0.3               | 32.9 ± 0.3   | 32.6 ± 0.4   | 0.611   |
| TC/HDL-C ratio                        | 2.3 ± 0.1                | 2.3 ± 0.1    | 2.5 ± 0.1    | 0.282   |
| Hypertension (%)                      | 58.72                    | 70.54        | 77.9         | <0.001  |
| Cancer (%)                            | 14.71                    | 21.03        | 39.45        | <0.001  |
| CVD (%)                               | 10.17                    | 15.35        | 18.71        | <0.001  |
| eGFR (mL/min per 1.73m <sup>2</sup> ) | 100.4 ± 0.7              | 86.6 ± 0.8   | 67.7 ± 1.0   | <0.001  |
| UACR (mg/g)                           | 50.2 ± 6.5               | 73.4 ± 8.7   | 284.4 ± 32.2 | <0.001  |
| HbA1c (%)                             | 7.6 ± 0.1                | 7.4 ± 0.1    | 7.3 ± 0.1    | 0.007   |
| HbA1c (mmol/mol)                      | 59.1 ± 0.8               | 57.7 ± 0.8   | 56.1 ± 0.8   | 0.007   |
| Duration of diabetes (year)           | 6.6 ± 0.3                | 8.5 ± 0.5    | 11.4 ± 0.5   | <0.001  |
| Diabetic complications (%)            | 24.9                     | 22.68        | 34.74        | 0.001   |
| Retinopathy (%)                       | 11.92                    | 12.49        | 21.27        | <0.001  |
| Foot ulcer/sore (%)                   | 2.528                    | 2.534        | 5.55         | 0.009   |
| Peripheral neuropathy (%)             | 14.84                    | 11.79        | 18.93        | 0.076   |
| Metformin (%)                         | 40.80                    | 43.30        | 34.32        | 0.027   |
| B12 supplements(%)                    | 36.37                    | 38.45        | 32.56        | 0.167   |
| B12 intake from foods (µg/d)          | 5.1 ± 0.4                | 4.9 ± 0.2    | 4.3 ± 0.1    | 0.042   |
| Serum B12 (pg/ml)                     | 671.9 ± 20.4             | 621.3 ± 18.8 | 504.7 ± 13.3 | <0.001  |

Data are represented as weighted percentage or mean (SE). P trend was estimated by weighted linear or logistic regression. BMI, body mass index; CVD, cardiovascular disease; eGFR, estimated glomerular filtration rate; HDL-C, High-density lipoprotein cholesterol; TC, total cholesterol; UACR, urinary albumin-creatinine ratio.

**Supplementary Table 5. The associations of all-cause mortality with serum and dietary cobalamin and MMA in diabetic patients**

|                       | Events/<br>Total num     | Unadjusted      |         | Model 1         |         | Model 2         |         | Model 3         |         |
|-----------------------|--------------------------|-----------------|---------|-----------------|---------|-----------------|---------|-----------------|---------|
|                       |                          | HR(95%CI)       | p value |
| Serum B12             |                          |                 |         |                 |         |                 |         |                 |         |
| log <sub>2</sub> B12  | 865/3,277                | 0.96(0.83-1.13) | 0.641   | 1.00(0.87-1.15) | 0.998   | 0.92(0.80-1.06) | 0.227   | 0.92(0.80-1.06) | 0.268   |
| Tertile 1             | 321/1093                 | 1.00(Reference) |         | 1.00(Reference) |         | 1.00(Reference) |         | 1.00(Reference) |         |
| Tertile 2             | 289/1095                 | 0.89(0.73-1.10) |         | 1.01(0.83-1.22) |         | 0.92(0.75-1.14) |         | 0.93(0.75-1.15) |         |
| Tertile 3             | 255/1089                 | 0.96(0.76-1.21) | *0.894  | 0.97(0.76-1.23) | *0.749  | 0.82(0.61-1.09) | *0.120  | 0.83(0.63-1.10) | *0.191  |
| B12 supplement        |                          |                 |         |                 |         |                 |         |                 |         |
| Use vs. Non-use       | 289/1047 vs.<br>576/2230 | 0.99(0.79-1.23) | 0.906   | 0.84(0.69-1.02) | 0.077   | 0.87(0.70-1.07) | 0.175   | 0.86(0.70-1.07) | 0.176   |
| B12 intake from foods |                          |                 |         |                 |         |                 |         |                 |         |
| increase per 5 µg/d   | 865/3277                 | 0.98(0.91-1.05) | 0.562   | 0.99(0.93-1.06) | 0.780   | 1.04(0.96-1.12) | 0.343   | 1.04(0.96-1.12) | 0.362   |
| Tertile 1             | 284/1017                 | 1.00(Reference) |         | 1.00(Reference) |         | 1.00(Reference) |         | 1.00(Reference) |         |
| Tertile 2             | 270/1013                 | 0.85(0.69-1.04) |         | 0.82(0.68-0.98) |         | 0.76(0.61-0.95) |         | 0.76(0.61-0.95) |         |
| Tertile 3             | 263/1012                 | 0.95(0.74-1.22) | *0.740  | 0.90(0.70-1.14) | *0.436  | 0.89(0.69-1.16) | *0.467  | 0.89(0.68-1.15) | *0.433  |
| Circulating MMA       |                          |                 |         |                 |         |                 |         |                 |         |
| log <sub>2</sub> MMA  | 865/3277                 | 1.67(1.47-1.88) | <0.001  | 1.41(1.26-1.58) | <0.001  | 1.31(1.18-1.45) | <0.001  | 1.31(1.18-1.46) | <0.001  |
| Tertile 1             | 166/1101                 | 1.00(Reference) |         | 1.00(Reference) |         | 1.00(Reference) |         | 1.00(Reference) |         |
| Tertile 2             | 262/1089                 | 2.11(1.69-2.64) |         | 1.55(1.22-1.97) |         | 1.46(1.12-1.91) |         | 1.45(1.11-1.90) |         |
| Tertile 3             | 437/1087                 | 4.14(3.15-5.46) | *<0.001 | 2.40(1.85-3.11) | *<0.001 | 1.71(1.27-2.31) | *0.002  | 1.72(1.27-2.33) | *0.002  |

B12, vitamin B12, cobalamin. MMA, methylmalonic acid. \*p for trend across the tertiles of B12 or MMA. HR (95% CI) was estimated by weighted Cox regression analyses. Model 1 was adjusted for age, sex, and race/ethnicity. Model 2 was additionally adjusted for smoking, BMI, hypertension, cancer, CVD,

TC/HDL-C ratio, serum cobalamin (continuous, only for MMA model 2), eGFR, HbA1c, metformin, duration of diabetes, UACR, and diabetic complications. Models for cobalamin supplements were further adjusted for cobalamin intake from foods ( $\mu\text{g/day}$ , continuous) and vice versa. Model 3 was adjusted for covariates in Model 2 except for metformin use.

**Supplementary Table 6. The associations of heart-specific mortality with B12 or MMA in patients with T2DM**

|                       | Events/<br>Total num    | Unadjusted      |          | Model 1         |         | Model 2         |         | Model 3         |         |
|-----------------------|-------------------------|-----------------|----------|-----------------|---------|-----------------|---------|-----------------|---------|
|                       |                         | HR(95%CI)       | p value* | HR(95%CI)       | p value | HR(95%CI)       | p value | HR(95%CI)       | p value |
| Serum B12             |                         |                 |          |                 |         |                 |         |                 |         |
| log <sub>2</sub> B12  | 200/3277                | 0.94(0.71-1.25) | 0.669    | 1.00(0.78-1.28) | 0.979   | 0.85(0.65-1.10) | 0.212   | 0.87(0.67-1.13) | 0.286   |
| Tertile 1             | 77/1093                 | 1.00(Reference) |          | 1.00(Reference) |         | 1.00(Reference) |         | 1.00(Reference) |         |
| Tertile 2             | 58/1095                 | 0.71(0.49-1.03) |          | 0.82(0.57-1.18) |         | 0.85(0.54-1.34) |         | 0.86(0.55-1.35) |         |
| Tertile 3             | 65/1089                 | 1.14(0.81-1.61) | *0.233   | 1.19(0.84-1.68) | *0.202  | 1.04(0.66-1.63) | *0.104  | 1.08(0.69-1.69) | *0.781  |
| B12 supplement        |                         |                 |          |                 |         |                 |         |                 |         |
| Users vs. Nonusers    | 132/2230<br>vs. 68/1047 | 1.11(0.78-1.59) | 0.554    | 0.96(0.68-1.35) | 0.810   | 0.89(0.62-1.28) | 0.532   | 0.90(0.63-1.29) | 0.553   |
| B12 intake from foods |                         |                 |          |                 |         |                 |         |                 |         |
| increase per 5µg/d    | 200/3277                | 0.88(0.65-1.20) | 0.413    | 0.84(0.57-1.25) | 0.382   | 0.96(0.68-1.34) | 0.804   | 0.95(0.68-1.34) | 0.784   |
| Tertile 1             | 69/1017                 | 1.00(Reference) |          | 1.00(Reference) |         | 1.00(Reference) |         | 1.00(Reference) |         |
| Tertile 2             | 66/1013                 | 0.75(0.47-1.20) |          | 0.68(0.43-1.06) |         | 0.67(0.38-1.16) |         | 0.67(0.38-1.17) |         |
| Tertile 3             | 51/1012                 | 0.67(0.41-1.12) | *0.130   | 0.55(0.34-0.91) | *0.022  | 0.63(0.36-1.12) | *0.133  | 0.62(0.35-1.10) | *0.120  |
| Circulating MMA       |                         |                 |          |                 |         |                 |         |                 |         |
| log <sub>2</sub> MMA  | 200/3277                | 1.78(1.53-2.08) | <0.001   | 1.57(1.35-1.82) | <0.001  | 1.38(1.14-1.67) | 0.001   | 1.41(1.16-1.71) | 0.001   |
| Tertile 1             | 36/1101                 | 1.00(Reference) |          | 1.00(Reference) |         | 1.00(Reference) |         | 1.00(Reference) |         |
| Tertile 2             | 59/1089                 | 2.30(1.33-4.01) |          | 1.68(0.93-3.04) |         | 1.49(0.80-2.81) |         | 1.48(0.78-2.78) |         |
| Tertile 3             | 105/1087                | 5.15(3.27-8.12) | *<0.001  | 2.96(1.81-4.86) | *<0.001 | 1.85(1.02-3.36) | *0.040  | 1.88(1.03-3.46) | *0.036  |

\* p for trend across the tertiles of B12 or MMA. HR (95%CI) was estimated by weighted Cox regression analyses. Model 1 was adjusted for age, sex and race/ethnicity. Model 2 was additionally adjusted for smoking, BMI, hypertension, cancer, CVD, TC/HDL-C ratio, serum B12 (only for MMA model 2), eGFR, HbA1c, metformin, duration of diabetes, UACR, and diabetic complications. Models for B12 supplements were further adjusted for B12 intake from foods, and vice versa. Model 3 was adjusted for covariates in Model 2 except for metformin use.

**Supplementary Table 7. The associations of cancer-related mortality with B12 or MMA in patients with T2DM**

|                       | Events/<br>Total num  | Unadjusted      |          | Model 1         |         | Model 2         |         | Model 3         |         |
|-----------------------|-----------------------|-----------------|----------|-----------------|---------|-----------------|---------|-----------------|---------|
|                       |                       | HR(95%CI)       | p value* | HR(95%CI)       | p value | HR(95%CI)       | p value | HR(95%CI)       | p value |
| Serum B12             |                       |                 |          |                 |         |                 |         |                 |         |
| log <sub>2</sub> B12  | 130/3277              | 0.73(0.54-0.99) | 0.044    | 0.77(0.59-1.01) | 0.061   | 0.79(0.58-1.07) | 0.126   | 0.80(0.59-1.07) | 0.135   |
| Tertile 1             | 55/1093               | 1.00(Reference) |          | 1.00(Reference) |         | 1.00(Reference) |         | 1.00(Reference) |         |
| Tertile 2             | 45/1095               | 0.88(0.51-1.52) |          | 0.95(0.55-1.66) |         | 1.01(0.54-1.90) |         | 1.02(0.55-1.90) |         |
| Tertile 3             | 30/1089               | 0.63(0.34-1.16) | 0.134    | 0.63(0.34-1.16) | 0.122   | 0.69(0.36-1.32) | 0.215   | 0.70(0.36-1.34) | *0.323  |
| B12 supplement        |                       |                 |          |                 |         |                 |         |                 |         |
| Users vs. Nonusers    | 85/2230<br>vs.45/1047 | 0.91(0.52-1.57) | 0.723    | 0.78(0.45-1.34) | 0.359   | 0.87(0.49-1.56) | 0.678   | 0.87(0.49-1.56) | 0.646   |
| B12 intake from foods |                       |                 |          |                 |         |                 |         |                 |         |
| increase per 5µg/d    | 130/3277              | 0.98(0.89-1.08) | 0.637    | 0.98(0.88-1.09) | 0.711   | 1.00(0.87-1.15) | 0.973   | 0.99(0.87-1.14) | 0.943   |
| Tertile 1             | 42/1017               | 1.00(Reference) |          | 1.00(Reference) |         | 1.00(Reference) |         | 1.00(Reference) |         |
| Tertile 2             | 35/1013               | 0.97(0.51-1.84) |          | 0.92(0.49-1.73) | 0.802   | 0.90(0.47-1.70) |         | 0.90(0.47-1.70) |         |
| Tertile 3             | 40/1012               | 1.27(0.75-2.16) | 0.339    | 1.21(0.71-2.08) | 0.477   | 1.15(0.65-2.03) | 0.585   | 1.14(0.64-2.02) | *0.610  |
| Circulating MMA       |                       |                 |          |                 |         |                 |         |                 |         |
| log <sub>2</sub> MMA  | 130/3277              | 1.38(1.10-1.74) | 0.006    | 1.14(0.82-1.59) | 0.416   | 1.15(0.84-1.57) | 0.390   | 1.16(0.84-1.60) | 0.365   |
| Tertile 1             | 34/1101               | 1.00(Reference) |          | 1.00(Reference) |         | 1.00(Reference) |         | 1.00(Reference) |         |
| Tertile 2             | 43/1089               | 1.23(0.67-2.23) |          | 0.94(0.52-1.67) |         | 0.96(0.54-1.71) |         | 0.95(0.53-1.70) |         |
| Tertile 3             | 53/1087               | 1.82(0.98-3.41) | 0.053    | 1.11(0.56-2.19) | 0.66    | 1.16(0.58-2.32) | 0.568   | 1.16(0.58-2.34) | *0.547  |

\* p for trend across the tertiles of B12 or MMA. HR (95%CI) was estimated by weighted Cox regression analyses. Model 1 was adjusted for age, sex and race/ethnicity. Model 2 was additionally adjusted for smoking, BMI, hypertension, cancer, CVD, TC/HDL-C ratio, serum B12 (only for MMA model 2), eGFR, HbA1c, metformin, duration of diabetes, UACR, and diabetic complications. Models for B12 supplements were further adjusted for B12 intake from foods, and vice versa. Model 3 was adjusted for covariates in Model 2 except for metformin use.

**Supplementary Table 8. Sensitivity analysis for the associations of all-cause mortality with B12 deficiency compared to normal B12**

| All-cause mortality | Serum vitamin B12        |                             |                          | p trend |
|---------------------|--------------------------|-----------------------------|--------------------------|---------|
|                     | ≥339 pg/ml<br>HR (95%CI) | 203-339 pg/ml<br>HR (95%CI) | <203 pg/ml<br>HR (95%CI) |         |
| Deaths/Total num    | 640/2560                 | 165/531                     | 60/186                   |         |
| Unadjusted          | 1.00 (Reference)         | 1.30 (1.01-1.68)            | 1.77 (1.22-2.58)         | 0.002   |
| Model 1             | 1.00 (Reference)         | 1.15 (0.91-1.46)            | 1.18 (0.78-1.79)         | 0.171   |
| Model 2             | 1.00 (Reference)         | 1.21 (0.92-1.61)            | 1.24 (0.82-1.87)         | 0.094   |

HR (95%CI) was estimated by weighted Cox regression analyses. Model 1 was adjusted for age, sex and race/ethnicity. Model 2 was additionally adjusted for smoking, BMI, hypertension, cancer, CVD, TC/HDL-C ratio, eGFR, HbA1c, metformin, duration of diabetes, UACR, and diabetic complications.

**Supplementary Table 9. Characteristics of diabetic adults in tertile 3 versus tertile 1 before and after matching**

|                                       | Before matching     |                     |            | After matching*    |                    |            |
|---------------------------------------|---------------------|---------------------|------------|--------------------|--------------------|------------|
|                                       | Tertile 1<br>N=1101 | Tertile 3<br>N=1087 | p<br>value | Tertile 1<br>N=393 | Tertile 3<br>N=393 | p<br>value |
| MMA (nmol/L)                          | 95.0 ± 0.6*         | 392.0 ± 35.6        | --         | 100.0 ± 0.8        | 374.9 ± 91.1       | --         |
| Age (year)                            | 55.9 ± 0.4          | 67.9 ± 0.4          | <0.001     | 61.8 ± 0.6         | 62.6 ± 0.6         | 0.362      |
| Male (%)                              | 48.6                | 51.4                | 0.102      | 57.5               | 52.4               | 0.152      |
| Race/ethnicity (%)                    |                     |                     | <0.001     |                    |                    | 0.887      |
| Non-Hispanic White                    | 23.5                | 48.3                |            | 36.4               | 37.6               |            |
| Non-Hispanic Black                    | 30.6                | 19.7                |            | 21.1               | 22.4               |            |
| Hispanic-Mexican                      | 27.9                | 16.1                |            | 22.1               | 20.1               |            |
| Other Ethnicity                       | 18                  | 15.9                |            | 20.4               | 19.9               |            |
| Smoking status (%)                    |                     |                     | <0.001     |                    |                    | 0.676      |
| Never                                 | 51.9                | 47                  |            | 46.1               | 48.6               |            |
| Former                                | 28.1                | 40.7                |            | 36.6               | 36.1               |            |
| Current                               | 20                  | 12.3                |            | 17.3               | 15.3               |            |
| BMI (kg/m <sup>2</sup> )              | 32.0 ± 0.2          | 31.5 ± 0.2          | 0.111      | 31.7 ± 0.4         | 31.5 ± 0.4         | 0.653      |
| Hypertension (%)                      | 63.5                | 78.8                | <0.001     | 71                 | 71.7               | 0.813      |
| Cancer (%)                            | 9.6                 | 16.2                | <0.001     | 13.5               | 16.3               | 0.271      |
| CVD (%)                               | 15.3                | 40.5                | <0.001     | 23.7               | 24.7               | 0.739      |
| TC/HDL-C ratio                        | 2.1 ± 0.1           | 2.4 ± 0.1           | 0.077      | 2.4 ± 0.2          | 2.4 ± 0.1          | 0.995      |
| eGFR (mL/min per 1.73m <sup>2</sup> ) | 99.2 ± 0.6          | 64.4 ± 0.8          | <0.001     | 85.9 ± 0.9         | 83.4 ± 1.03        | 0.137      |
| UACR (mg/g)                           | 84.2 ± 18.2         | 394.7 ± 40.8        | <0.001     | 132.0 ± 47.0       | 162.5 ± 38.1       | 0.614      |
| HbA1c (%)                             | 7.7 ± 0.1           | 7.3 ± 0.1           | <0.001     | 7.5 ± 0.1          | 7.5 ± 0.1          | 0.925      |
| Metformin (%)                         | 40.2                | 32.2                | <0.001     | 38.7               | 36.9               | 0.607      |
| Duration of diabetes (year)           | 7.5 ± 0.3           | 12.4 ± 0.4          | <0.001     | 9.1 ± 0.6          | 9.6 ± 0.7          | 0.562      |
| Diabetic complications (%)            | 26.3                | 37.1                | <0.001     | 30                 | 32.1               | 0.538      |
| Serum B12 (pg/ml)                     | 612.4 ± 70.8        | 386.6 ± 9.0         | <0.001     | 398.6 ± 8.3        | 410.6 ± 14.1       | 0.462      |

Data are represented as percentage or mean (SE). P value was assessed by student t test or chi test. \*All estimates were unweighted that were different with the weighted estimates in **supplementary table 5**. #A propensity score–matching approach was used to balance the baseline differences between tertile 1 and tertile 3, including age, sex, race/ethnicity, smoking, BMI, hypertension, cancer, CVD, TC/HDL-C ratio, eGFR, HbA1c, metformin, duration of diabetes, UACR, diabetic complications, and serum B12. Paired participants were selected using the nearest neighbor matching algorithm and non-replacement method with a caliper size of 0.2 standard deviation of the logit of the propensity score.

**Supplementary Table 10. The hazard ratio for mortality in tertile 3 versus tertile 1 estimated by adjustment or matching**

|                            | Tertile 1<br>Deaths/<br>total num | Tertile 3<br>Deaths/<br>total num | HR (95%CI)       | p value |
|----------------------------|-----------------------------------|-----------------------------------|------------------|---------|
| Multivariable-adjusted*    | 166/1101                          | 437/1087                          | 1.91 (1.48-2.45) | <0.001  |
| Propensity score matching# | 75/393                            | 110/393                           | 2.09 (1.55-2.80) | <0.001  |

\*HR (95%CI) was estimated by unweighted Cox regression analyses. adjusted for age, sex, race/ethnicity, smoking, BMI, hypertension, cancer, CVD, TC/HDL-C ratio, eGFR, HbA1c, metformin, duration of diabetes, UACR, diabetic complications, and serum B12. # HR (95%CI) was estimated after matching the covariates that multivariable-adjusted model included.



**Supplementary Table 11. Sensitivity analysis for the associations of all-cause mortality with dietary and serum cobalamin, MMA, and sensitivity to cobalamin restricted in patients taking anti-diabetic agents**

|                                         | Deaths/<br>total num  | Metformin use<br>(n= 1242)<br>HR(95%CI) | p value | Deaths/<br>total num   | Non-use<br>(n= 951)<br>HR(95%CI) | p value |
|-----------------------------------------|-----------------------|-----------------------------------------|---------|------------------------|----------------------------------|---------|
| B12 supplements*                        | 70/406 vs.<br>144/836 | 0.87 (0.58-1.30)                        | 0.496   | 136/301 vs.<br>276/650 | 0.79 (0.60-1.06)                 | 0.114   |
| B12 intake from foods <sup>#</sup>      | 214/1242              | 0.90 (0.72-1.12)                        | 0.333   | 412/951                | 1.10 (0.94-1.29)                 | 0.246   |
| Serum B12 (Log <sub>2</sub> B12)        | 214/1242              | 0.79 (0.62-1.02)                        | 0.073   | 412/951                | 0.89 (0.73-1.09)                 | 0.261   |
| Circulating MMA (Log <sub>2</sub> MMA)  | 214/1242              | 1.16 (0.88-1.62)                        | 0.291   | 412/951                | 1.29 (1.11-1.51)                 | 0.002   |
| Combination of MMA and B12              |                       |                                         |         |                        |                                  |         |
| MMA <sub>low</sub> B12 <sub>low</sub>   | 68/320                | 1.00(Reference)                         | -       | 54/142                 | 1.00(Reference)                  | -       |
| MMA <sub>low</sub> B12 <sub>high</sub>  | 107/761               | 0.90 (0.58-1.40)                        | 0.629   | 194/542                | 0.90 (0.58-1.41)                 | 0.653   |
| MMA <sub>high</sub> B12 <sub>low</sub>  | 28/115                | 1.31 (0.74-2.31)                        | 0.352   | 57/91                  | 1.61 (1.01-2.56)                 | 0.047   |
| MMA <sub>high</sub> B12 <sub>high</sub> | 11/46                 | 1.28 (0.36-4.52)                        | 0.702   | 107/176                | 1.71 (1.16-2.52)                 | 0.007   |

\* B12 supplements use versus non-use, # B12 intake from foods increase per 5µg/d. HR (95%CI) was estimated by weighted Cox regression analyses after adjustment for age, sex and race/ethnicity, smoking, BMI, hypertension, cancer, CVD, TC/HDL-C ratio, serum B12 (only for MMA model), eGFR, HbA1c, duration of diabetes, UACR, and diabetic complications. Model for B12 supplements was further adjusted for B12 intake from foods, and vice versa.
